# Supplementary material for: The Toll-Like Receptor 5 agonist flagellin prevents Non-typeable Haemophilus influenzae-induced infection in cigarette smoke-exposed mice
Source: PubMed Central journal article supplement (PMC8009382; doi:10.1371/journal.pone.0236216), 2021-03-30
Supplement: pone.0236216.s003.pdf [file pone.0236216.s003.pdf]

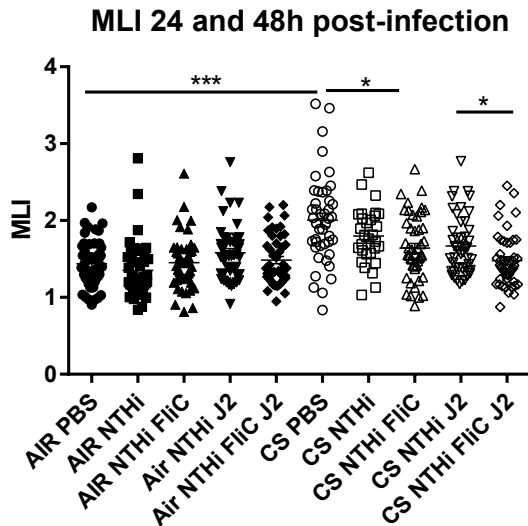

**Supplementary figure 3: Flagellin reduce the emphysema in the lung of NTHi-infected cigarette smoke-exposed mice.** Emphysema was reported as median mean linear intercept (MLI). Three independent experiments have been performed with at least 3 mice in each group. Results were obtained by Image software and the data are expressed as mean  $\pm$  SEM. \*:  $p < 0.05$ , \*\*\*:  $p < 0.001$ .
