# Supplementary material for: The Toll-Like Receptor 5 agonist flagellin prevents Non-typeable Haemophilus influenzae-induced infection in cigarette smoke-exposed mice
Source: PubMed Central journal article supplement (PMC8009382; doi:10.1371/journal.pone.0236216), 2021-03-30
Supplement: pone.0236216.s004.pdf [file pone.0236216.s004.pdf]

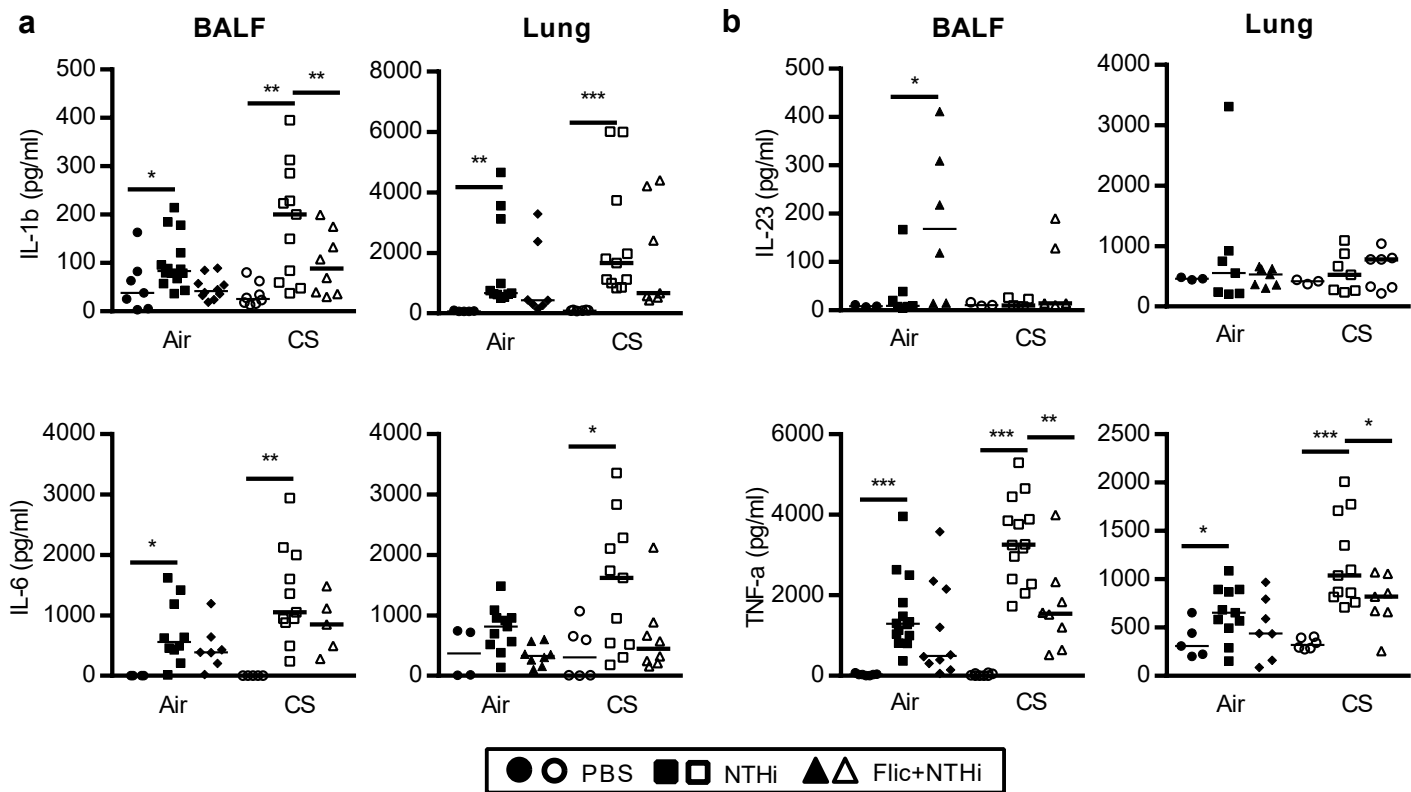

**Supplementary figure 4:** Modulation by flagellin of cytokine production in the lung of Air- and cigarette smoke-exposed mice infected with NTHi. Concentrations of inflammatory cytokines ( (a) IL-1b, IL-6); (b) TNF-a and IL-23 ) were measured in the BAL fluid and the lungs of control and cigarette smoke-exposed mice infected (24h) or not with NTHi and treated or not with flagellin (FliC). Cytokine concentrations were determined by ELISA. Three independent experiments have been performed with 4 mice in each group. The data are expressed as mean  $\pm$  SEM. \*:  $p < 0.05$ , \*\*:  $p < 0.01$ , \*\*\*:  $p < 0.001$ .
