# Supplementary material for: The Toll-Like Receptor 5 agonist flagellin prevents Non-typeable Haemophilus influenzae-induced infection in cigarette smoke-exposed mice
Source: PubMed Central journal article supplement (PMC8009382; doi:10.1371/journal.pone.0236216), 2021-03-30
Supplement: pone.0236216.s007.pdf [file pone.0236216.s007.pdf]

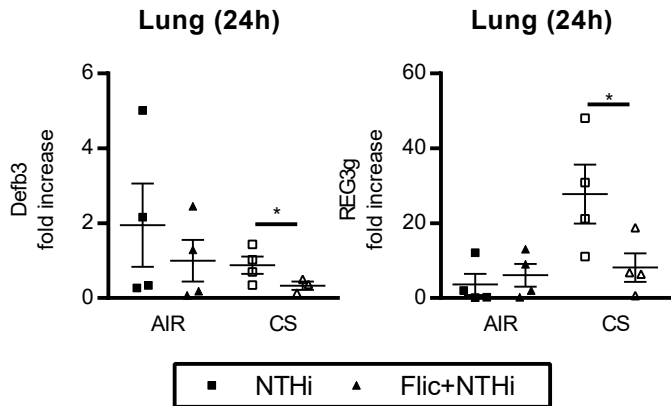

**Supplementary figure 7 : Flagellin reduce the Defb3 and REG3g mRNA expression in the lung of NTHi-infected cigarette smoke-exposed mice.** Results were obtained by qPCR and the data are expressed as mean  $\pm$  SEM. \*:  $p < 0.05$ .
